# Supplementary material
Source: PubMed Central journal article supplement (PMC4855382)
Supplement: rspb20160130supp1.pdf [file rspb20160130supp1.pdf]

Table S1 Amplification results and radiocarbon dates

| Sample Identifier | Species             | Location                        | Site                    | Source/ Catalogue Number                                          | Approximate Age | Successfully Amplified | OxA Identifier | AMS 14C Date   | Calibrated Date |
|-------------------|---------------------|---------------------------------|-------------------------|-------------------------------------------------------------------|-----------------|------------------------|----------------|----------------|-----------------|
| 117               | <i>A. amphibius</i> | Belgium, Ardennes               | Trou Al'Wesse           | J. Stewart (Bournemouth University)                               | Holocene        | Yes                    |                |                |                 |
| 116               | <i>A. amphibius</i> | Belgium, Ardennes               | Trou Al'Wesse           | J. Stewart (Bournemouth University)                               | Pleistocene     | Yes                    |                |                |                 |
| 118               | <i>A. amphibius</i> | Belgium, Ardennes               | Trou Al'Wesse           | J. Stewart (Bournemouth University)                               | Pleistocene     | Yes                    |                |                |                 |
| 119               | <i>A. amphibius</i> | Belgium, Ardennes               | Trou Al'Wesse           | J. Stewart (Bournemouth University)                               | Pleistocene     | No                     |                |                |                 |
| 120               | <i>A. amphibius</i> | Belgium, Ardennes               | Trou Al'Wesse           | J. Stewart (Bournemouth University)                               | Pleistocene     | No                     |                |                |                 |
| 164               | <i>A. amphibius</i> | Belgium, Ardennes               | Trou du Frontal         | Royal Belgian Institute of Natural Sciences (Brussels)/ Site 544  | Early Holocene  | No                     | OxA-21078      | 9,455 +/- 55   | 10,699          |
| 160               | <i>A. amphibius</i> | Belgium, Namur                  | Marie-Jeanne Cave       | Royal Belgian Institute of Natural Sciences (Brussels)/ Site 1034 | Early Holocene  | Yes                    |                |                |                 |
| 161               | <i>A. amphibius</i> | Belgium, Namur                  | Marie-Jeanne Cave       | Royal Belgian Institute of Natural Sciences (Brussels)/ Site 542  | Pleistocene     | 575 bp (IA)            |                |                |                 |
| 163               | <i>A. amphibius</i> | Belgium, Namur                  | Marie-Jeanne Cave       | Royal Belgian Institute of Natural Sciences (Brussels)/ Site 1035 | Pleistocene     | No                     |                |                |                 |
| 162               | <i>A. amphibius</i> | Belgium, Namur                  | Marie-Jeanne Cave       | Royal Belgian Institute of Natural Sciences (Brussels)/ Site 1035 | Pleistocene     | <200 bp (NIA)          |                |                |                 |
| 121               | <i>A. amphibius</i> | England, Somerset               | Bridged Pot             | J. Stewart (Bournemouth University)                               | Younger Dryas   | Yes                    |                |                |                 |
| 122               | <i>A. amphibius</i> | England, Somerset               | Bridged Pot             | J. Stewart (Bournemouth University)                               | Younger Dryas   | Yes                    |                |                |                 |
| 123               | <i>A. amphibius</i> | England, Somerset               | Bridged Pot             | J. Stewart (Bournemouth University)                               | Younger Dryas   | Yes                    |                |                |                 |
| 124               | <i>A. amphibius</i> | England, Somerset               | Bridged Pot             | J. Stewart (Bournemouth University)                               | Younger Dryas   | Yes                    |                |                |                 |
| 125               | <i>A. amphibius</i> | England, Somerset               | Bridged Pot             | J. Stewart (Bournemouth University)                               | Younger Dryas   | Yes                    |                |                |                 |
| 156               | <i>A. amphibius</i> | England, Somerset               | Bridged Pot             | Natural History Museum (London)                                   | Younger Dryas   | Yes                    |                |                |                 |
| 187               | <i>A. amphibius</i> | England, Somerset               | Gully Cave              | D. Schreve (Royal Holloway, University of London)                 | Pleistocene     | Yes                    | OxA- 20249     | 12485 +/- 60   | 14,621          |
| 93                | <i>A. amphibius</i> | England, Staffordshire          | Ossom's Eyrie Cave      | Manchester University Museum (Manchester)                         | Roman           | Yes                    |                |                |                 |
| 101               | <i>A. amphibius</i> | England, Staffordshire          | Ossom's Eyrie Cave      | Manchester University Museum (Manchester)                         | Roman           | Yes                    |                |                |                 |
| 103               | <i>A. amphibius</i> | England, Staffordshire          | Thor's Fissure          | Buxton Museum (Derbyshire)                                        | Roman           | Yes                    |                |                |                 |
| 92                | <i>A. amphibius</i> | England, Derbyshire             | Pin Hole Lower Cave     | Manchester University Museum (Manchester)                         | Pleistocene     | Yes                    |                |                |                 |
| 97                | <i>A. amphibius</i> | England, Derbyshire             | Pin Hole Lower Cave     | Manchester University Museum (Manchester)                         | Pleistocene     | Yes                    |                |                |                 |
| 105               | <i>A. amphibius</i> | England, Derbyshire             | Pin Hole Lower Cave     | Manchester University Museum (Manchester)                         | Pleistocene     | Yes                    |                |                |                 |
| 104               | <i>A. amphibius</i> | England, Derbyshire             | Wigber Low              | Sheffield City Museum (Sheffield)                                 | Bronze          | Yes                    |                |                |                 |
| 106               | <i>A. amphibius</i> | England, Derbyshire             | Wigber Low              | Sheffield City Museum (Sheffield)                                 | Bronze          | Yes                    |                |                |                 |
| 107               | <i>A. amphibius</i> | England, Derbyshire             | Wigber Low              | Sheffield City Museum (Sheffield)                                 | Bronze          | Yes                    |                |                |                 |
| 157               | <i>A. amphibius</i> | England, Kent                   | Ightham Fissures        | Natural History Museum (London)/ Site 276                         | Pleistocene     | No                     | OxA-21075      | 23,100 +/- 170 | 27,955          |
| 155               | <i>A. amphibius</i> | England, Kent                   | Ightham Fissures        | Natural History Museum (London)                                   | Holocene        | <200 bp (NIA)          | OxA-21074      | 8,560 +/- 40   | 9,532           |
| 158               | <i>A. amphibius</i> | Wales, Gwent                    | Merlin's Cave           | Natural History Museum (London)/ Site 167                         | Younger Dryas   | Yes                    | OxA-21076      | 10,295 +/- 45  | 12,081          |
| 159               | <i>A. amphibius</i> | Wales, Gwent                    | Merlin's Cave           | Natural History Museum (London)/ Site 167                         | Holocene        | Yes                    | OxA-21077      | 2,797 +/- 27   | 2,900           |
| 113               | <i>A. amphibius</i> | France, Pyrennes                | Poeymaü                 | Musee national de Prehistoire (Dordogne)                          | Younger Dryas   | <200 bp (NIA)          | OxA-21079      | 10,065 +/- 45  | 11,611          |
| 154               | <i>A. amphibius</i> | France, Tarn-et-Garonne         | Courbet                 | Natural History Museum (London)/ Site 791                         | Pleistocene     | No                     |                |                |                 |
| 99                | <i>A. amphibius</i> | Germany, Harz Mountains         | Fuchsloch im Krockstein | Museum für Naturkunde (Berlin)                                    | Younger Dryas   | Yes                    | OxA-21118      | 11,110 +/-50   | 12,999          |
| 111               | <i>A. amphibius</i> | Germany, Harz Mountains         | Fuchsloch im Krockstein | Museum für Naturkunde (Berlin)                                    | Younger Dryas   | 575 bp (IA)            | OxA-21111      | 10,035 +/- 50  | 11,538          |
| 110               | <i>A. amphibius</i> | Germany, Harz Mountains         | Fuchsloch im Krockstein | Museum für Naturkunde (Berlin)                                    | Younger Dryas   | No                     | OxA-21082      | 11,005 +/- 50  | 12,874          |
| 95                | <i>A. amphibius</i> | Germany, Mecklenburg-Vorpommern | Pisede bei Malchin      | Museum für Naturkunde (Berlin)/ 70.III.1.1.42                     | Holocene        | Yes                    | OxA-2332       | 3,048 +/- 26   | 3,279           |
| 112               | <i>A. amphibius</i> | Germany, Mecklenburg-Vorpommern | Pisede bei Malchin      | Museum für Naturkunde (Berlin)/ 70.IV.445.4                       | Holocene        | 565 bp (IA)            | OxA-2335       | 2,921 +/- 30   | 3,070           |
| 96                | <i>A. amphibius</i> | Germany, Mecklenburg-Vorpommern | Pisede bei Malchin      | Museum für Naturkunde (Berlin)/ 70.IV.6.4.8                       | Holocene        | Yes                    | OxA-21080      | 2,546 +/- 26   | 2,687           |
| 100               | <i>A. amphibius</i> | Hungary, Szergerd               | Bélmegyér               | Hungarian Institute of Geology (Budapest)/ V.15249                | Holocene        | Yes                    |                |                |                 |
| 90                | <i>A. amphibius</i> | Hungary, Budapest               | Piliisszántó            | Hungarian Institute of Geology (Budapest)/ V.13857                | Pleistocene     | Yes                    | OxA-21119      | 13,475 +/- 65  | 16,653          |

|     |                     |                                       |                    |                                                    |             |     |             |                |        |
|-----|---------------------|---------------------------------------|--------------------|----------------------------------------------------|-------------|-----|-------------|----------------|--------|
| 109 | <i>A. amphibius</i> | Hungary, Bükk Mountains               | Balla Cave         | Hungarian Institute of Geology (Budapest)/ V.10137 | Pleistocene | No  | OxA-21112   | 12,515 +/- 60  | 14,681 |
| 94  | <i>A. amphibius</i> | Italy, Veneto                         | Grotta del Broion  | University of Ferrara (Ferrara)                    | Pleistocene | No  |             |                |        |
| 98  | <i>A. amphibius</i> | Italy, Veneto                         | Grotta del Broion  | University of Ferrara (Ferrara)                    | Pleistocene | No  |             |                |        |
| 102 | <i>A. amphibius</i> | Italy, Veneto                         | Grotta del Broion  | University of Ferrara (Ferrara)                    | Pleistocene | No  |             |                |        |
| 91  | <i>A. amphibius</i> | Slovakia, Lesser Carpathian Mountains | Dzeravá skala Cave | Hungarian Institute of Geology (Budapest)/ V.19258 | Pleistocene | Yes | OxA-21081   | 22,410 +/- 150 | 27,137 |
| 114 | <i>A. amphibius</i> | Ukraine, Kiev                         |                    | Moscow Institute of Geography (Moscow)/ Site 1019  | Historical  |     | 565 bp (IA) |                |        |
| 115 | <i>A. amphibius</i> | Ukraine, Novomirgorod                 |                    | Moscow Institute of Geography (Moscow)             | Historical  | Yes |             |                |        |
| 108 | <i>A. amphibius</i> | Romania, Casian                       |                    | Institute of Speleology Emil Racovitza (Bucharest) | Historical  | Yes |             |                |        |
| 207 | <i>A. amphibius</i> | Belgium                               |                    | Natural History Museum (London)/ 1919.7.7.2164     | Historical  | No  |             |                |        |
| 212 | <i>A. amphibius</i> | Belgium, Longchamps                   |                    | Natural History Museum (London)/ 1919.7.7.2165     | Historical  | Yes |             |                |        |
| 194 | <i>A. amphibius</i> | England, Surrey                       |                    | Natural History Museum (London)/ 1904.10.13.1      | Historical  | Yes |             |                |        |
| 198 | <i>A. amphibius</i> | England, Hertfordshire                |                    | Natural History Museum (London)/ 1948.1            | Historical  | Yes |             |                |        |
| 201 | <i>A. amphibius</i> | England, Norfolk                      |                    | Natural History Museum (London)/ 1985.561          | Historical  | Yes |             |                |        |
| 199 | <i>A. amphibius</i> | England, Yorkshire                    |                    | Natural History Museum (London)/ 1911.1.2.57       | Historical  | Yes |             |                |        |
| 206 | <i>A. amphibius</i> | England, Cambridgeshire               |                    | Natural History Museum (London)/ 1969.776          | Historical  | Yes |             |                |        |
| 200 | <i>A. amphibius</i> | England, Northumberland               |                    | Natural History Museum (London)/ 1928.7.2.1        | Historical  | Yes |             |                |        |
| 195 | <i>A. amphibius</i> | England, Lincolnshire, Reads Island   |                    | Natural History Museum (London)/ 1960.2105         | Historical  | Yes |             |                |        |
| 204 | <i>A. amphibius</i> | England, Shropshire                   |                    | Natural History Museum (London)/ 1936.11.16.7      | Historical  | Yes |             |                |        |
| 205 | <i>A. amphibius</i> | England, Shropshire                   |                    | Natural History Museum (London)/ 1936.11.16.9      | Historical  | Yes |             |                |        |
| 197 | <i>A. amphibius</i> | England, Norfolk                      |                    | Natural History Museum (London)/ 1985.549          | Historical  | Yes |             |                |        |
| 202 | <i>A. amphibius</i> | Scotland, Fife                        |                    | Natural History Museum (London)/ 1906.11.18.6      | Historical  | Yes |             |                |        |
| 196 | <i>A. amphibius</i> | Scotland, Morayshire                  |                    | Natural History Museum (London)/ 1911.2.10.1       | Historical  | Yes |             |                |        |
| 211 | <i>A. amphibius</i> | Estonia, Kihnu Saar                   |                    | Natural History Museum (London)/ 1925.6.1.41       | Historical  | Yes |             |                |        |
| 226 | <i>A. amphibius</i> | Estonia, Kuusnomme                    |                    | Natural History Museum (London)/ 1925.6.1.43       | Historical  | Yes |             |                |        |
| 218 | <i>A. amphibius</i> | Finland, Drumso                       |                    | Natural History Museum (London)/ 1901.6.9.3        | Historical  | Yes |             |                |        |
| 215 | <i>A. amphibius</i> | Italy, Cerignola                      |                    | Natural History Museum (London)/ 1916.7.8.1        | Historical  | Yes |             |                |        |
| 203 | <i>A. amphibius</i> | Italy, Modena                         |                    | Natural History Museum (London)/ 1890.3.5.3        | Historical  | Yes |             |                |        |
| 224 | <i>A. amphibius</i> | Macedonia, Kos-Alija                  |                    | Natural History Museum (London)/ 1937.3.22.47      | Historical  | Yes |             |                |        |
| 227 | <i>A. amphibius</i> | Macedonia, Stirovica                  |                    | Natural History Museum (London)/ 1937.3.22.5       | Historical  | Yes |             |                |        |
| 220 | <i>A. amphibius</i> | Norway, Surnadal                      |                    | Natural History Museum (London)/ 1930.10.4.30      | Historical  | Yes |             |                |        |
| 210 | <i>A. amphibius</i> | Russia, Saratov                       |                    | Natural History Museum (London)/ 1928.4.4.36       | Historical  | Yes |             |                |        |
| 225 | <i>A. amphibius</i> | Russia, Semiretcheusk                 |                    | Natural History Museum (London)/ 1914.5.10.146     | Historical  |     | 575 bp (IA) |                |        |
| 223 | <i>A. amphibius</i> | Russia, Volsk                         |                    | Natural History Museum (London)/ 1928.4.4.33       | Historical  | Yes |             |                |        |
| 214 | <i>A. amphibius</i> | Sweden, Stockholm                     |                    | Natural History Museum (London)/ 1849.11.1.27      | Historical  | Yes |             |                |        |
| 216 | <i>A. amphibius</i> | Sweden, Uppsala                       |                    | Natural History Museum (London)/ 1900.5.15.1       | Historical  | Yes |             |                |        |
| 219 | <i>A. amphibius</i> | Switzerland, Locarno                  |                    | Natural History Museum (London)/ 1902.7.1.5        | Historical  | Yes |             |                |        |
| 213 | <i>A. scherman</i>  | France, Biarritz                      |                    | Natural History Museum (London)/ 1906.6.4.22       | Historical  | Yes |             |                |        |
| 221 | <i>A. scherman</i>  | France, Cranves Sales                 |                    | Natural History Museum (London)/ 1905.11.18.19     | Historical  | Yes |             |                |        |
| 222 | <i>A. scherman</i>  | Slovenia, Ormozu                      |                    | Natural History Museum (London)/ 1937.4.16.20      | Historical  | Yes |             |                |        |
| 208 | <i>A. sapidus</i>   | Portugal, Barbacena                   |                    | Natural History Museum (London)/ 1936.4.2.12       | Historical  | Yes |             |                |        |
| 217 | <i>A. sapidus</i>   | France, St Gilles                     |                    | Natural History Museum (London)/ 1908.8.4.261      | Historical  | Yes |             |                |        |
| 209 | <i>A. sapidus</i>   | France, Valescure                     |                    | Natural History Museum (London)/ 1908.8.4.258      | Historical  | Yes |             |                |        |
