# Supplementary material
Source: PubMed Central journal article supplement (PMC4855382)
Supplement: rspb20160130supp2.pdf [file rspb20160130supp2.pdf]

Table S2 Details of the primer pairs used in this study

| Primer | Forward 5' to 3'              | Reverse 5' to 3'              | Product Length | Annealing Temp (°C) |
|--------|-------------------------------|-------------------------------|----------------|---------------------|
| A      | ACATCTGGTTCTTACCTCAGGG        | CCTTGACGGCTATGCTGAGT          | 173            | 52                  |
| B      | TCTCGGGCAGTTGGTATTTTTTA       | TATATGTCCCGGATCCATTGATTA      | 161            | 52                  |
| C      | TCACCTTGCCTGTAGCTGGACTTC      | GGGGGTTTGGCAAGCAAAG           | 209            | 52                  |
| D      | CCCAGCTCTGNTAGGCTAAA          | TTTCAAGTACACAGGGAGGC          | 158            | 51                  |
| E      | CCCCAAAAACAAGCGAAAC           | CAGTGCTTTGCTTTAATATAAGCTACATT | 203            | 50                  |
| F      | TTACTACCAAAAAACAACCTCAAATTCCA | TATAAGGCCAGGACCAAACCTTTG      | 158            | 50                  |
